# Supplementary material for: Exploring the Synthetic Chemistry of Phenyl-3-(5-aryl-2-furyl)- 2-propen-1-ones as Urease Inhibitors: Mechanistic Approach through Urease Inhibition, Molecular Docking and Structure–Activity Relationship
Source: MDPI journal article supplement (doi:10.3390/biomedicines11092428), 2023-08-30
Supplement: s1 [file s1]

# Exploring the Synthetic Chemistry of Phenyl-3-(5-aryl-2-furyl)-2-propen-1-ones as Urease Inhibitors: Mechanistic Approach through Urease Inhibition, Molecular Docking and SAR

Miraj Fatima,<sup>1</sup>Samina Aslam<sup>1,2,\*</sup>, Ansa Madeeha Zafar<sup>2,3</sup>, Ali Irfan<sup>4</sup>, Misbahul Ain Khan<sup>2</sup>, Muhammad Ashraf<sup>5</sup>, Shah Faisal<sup>6</sup>, Sobia Noreen<sup>7</sup>, Gamal A. Shazly<sup>8</sup>, Bakht Ramin Shah<sup>9</sup>, Yousef A. Bin Jordan<sup>8,\*</sup>

<sup>1</sup>Department of Chemistry, The Women University Multan-2023, Pakistan

<sup>2</sup>Department of Chemistry, The Islamia University of Bahawalpur, Bahawalpur-63100, Pakistan

<sup>3</sup>Department of Chemistry, Government Sadiq Women University, Bahawalpur-63100, Pakistan

<sup>4</sup> Department of Chemistry, Government College University Faisalabad, Faisalabad-38000, Pakistan; raialiirfan@gmail.com (A.I.)

<sup>5</sup>Department of Biotechnology and Biochemistry, The Islamia University of Bahawalpur, Bahawalpur-63100, Pakistan

<sup>6</sup>Department of Chemistry, Islamia College University Peshawar, Peshawar 25120, Pakistan

<sup>7</sup> Institute of Chemistry, University of Sargodha, Sargodha-40100, Pakistan

<sup>8</sup>Department of Pharmaceutics, College of Pharmacy, King Saud University, Riyadh 11451, Saudi Arabia

<sup>9</sup> Skin Barrier Research Group, Faculty of Pharmacy in Hradec Králové, Charles University, Hradec Králové, Czech Republic,

\*Correspondence: drsamina.chem@wum.edu.pk (S. A.); ybinjordan@ksu.edu.sa (Y. A. B. J)

## Spectral Characterization Data Of Furan Chalcones **4a-4s**

### 1- 1-phenyl-3-[5-(4'-nitrophenyl)-2-furyl]-2-propen-1-one **4a**

Yellow crystalline solid; (FTIR (KBr) (v, cm<sup>-1</sup>): 1664.91(C=O conjugated carbonyl group), 15985(C=C conjugated) 1562.44 and 1326.24 (Asym and sym -NO<sub>2</sub>), Mass spectrum (EI, 70 eV, I<sub>rel</sub> %): 319 [M<sup>+</sup>] (100), 273 [M<sup>+</sup>- NO<sub>2</sub>] (12), 242 [M<sup>+</sup>- Ph] (32), 77 [Ph] (23), 105 [PhCO] (23), 215 [PhNO<sub>2</sub>furanCH=CH] (55), <sup>1</sup>H NMR (CDCl<sub>3</sub>, 300MHz), δ ppm( J, Hz) : 8.53 (1H, d, J = 6.3, Ar-H), 7.70 (1H, d, J = 6.3, Ar-H), 7.61 (1H, d, J = 3.4, Ar-H), 7.57 (1H, d, J = 3.4, Ar-H), 7.52(1H, d, J = 4.4, Ar-H), 7.48 (1H, d, J = 4.4, Ar-H), 7.40 (1H, d, J = 16.3, ethylenic), 7.31 (d1H,d, J = 16.3, ethylenic), 6.80 (1H, d, J = 2.4, furyl proton), 6.76 (1H, d, J = 2.4, furyl proton), <sup>13</sup>C NMR (CDCl<sub>3</sub>, 75 MHz) δ ppm: 189.56 (C=O), 129.90, 128.48 (C=C), 153.58, 152.96, 142.35, 141.46, 138.05, 135.36, 132.99, 129.28 128.72, 124.46, 120.59, 118.37,

111.63 (Ar-C) Anal.Calcd.for C<sub>19</sub>H<sub>13</sub>NO<sub>4</sub>: C 71.47; H 4.07; N 4.38, Found C 71.27; H 3.90; N 4.36.

#### **2- 1-phenyl-3-[5-(4'-chlorophenyl)-2-furyl]-2-propen-1-one 4b**

Yellow crystalline solid; (FTIR (KBr) ( $\nu$ , cm<sup>-1</sup>1646.14(C=O conjugated carbonyl group), 1585.50 (C=Cconjugated) 1092.68 (C-Cl bond), Mass spectrum(EI,70eV,I<sub>rel</sub>%): 310[M<sup>+</sup>+2](27), 308[M<sup>+</sup>](80), 273[M<sup>+</sup>-Cl](15), 231[M<sup>+</sup>-Ph](19), 105[PhCO](18),197[M<sup>+</sup>-PhCl](14), <sup>1</sup>HNMR(CDCl<sub>3</sub>,300MHz), $\delta$ ppm (J,H<sub>z</sub>): 8.04(1H,d,J=5.7,Ar-H), 7.70(1H,d,J=5.7,Ar-H), 7.61(1H,d,J=3.0,Ar-H), 7.57(1H,d,J=3.0,Ar-H), 7.52(1H,d,J=4.2,Ar-H), 7.48(1H,d,J=4.2,Ar-H), 7.40(1H,d,J=15.0,ethylenic), 7.10(1H,d, J =15.0, ethylenic), 6.80(1H, d, J= 2.7, furylproton),6.76 (1H,d, J =2.7, furyl proton), <sup>13</sup>CNMR(CDCl<sub>3</sub>,75MHz) $\delta$ ppm: 189.78(C=O),155.24,151.43(C=C),138.30,134.40,132.74,130.34,129.15,128.63,128.43,125.69,119.12,118.69,108.59(Ar-C) Anal.Calcd.for C<sub>19</sub>H<sub>13</sub>ClO<sub>2</sub>:C 74.01;H 4.22; Found C 73.90;H 4.18.

#### **3- 1-phenyl-3-[5-(4'-bromophenyl)-2-furyl]-2-propen-1-one4c**

Yellow crystalline solid; (FTIR (KBr) ( $\nu$ , cm<sup>-1</sup>): 1666.45 (C=O), 2360.46 (Aromatic ring), 1588.87 (C=Cconjugated) 1029.97 (C-Br bond), Mass spectrum (EI, 70 eV, I<sub>rel</sub> %): 354 [M<sup>+</sup>+2] (100), 352 [M<sup>+</sup>] (94), 273 [M<sup>+</sup>-Br] (28), 197 [M<sup>+</sup>-PhBr] (24), 157 [PhBr] (6), 105 [PhCO] (28), <sup>1</sup>H NMR (CDCl<sub>3</sub>,300MHz),  $\delta$  ppm ( J, Hz) : 8.04 (1H, d, J = 5.7, Ar-H), 7.73-7.48 (8H, m, Ar-H), 7.47 (1H, d, J =15.5, ethylenic), 7.24 (1H, d, J = 15.5, ethylenic), 6.79 (1H, d, J = 3.3, furyl proton), 6.77 (1H, d, J = 3.3, furyl proton), <sup>13</sup>C NMR (CDCl<sub>3</sub>, 75 MHz)  $\delta$  ppm: 189.77 (C=O), 155.23, 151.43 (C=C), 138.24, 132.77, 132.07, 130.34, 128.71, 128.63, 128.43, 125.89, 122.56, 119.09, 118.77,108.70 (Ar-C) Anal.Calcd.for C<sub>19</sub>H<sub>13</sub>BrO<sub>2</sub>: C 64.77; H 3.69; Found C 64.91; H 3.44.

#### **4- 1-phenyl-3-[5-(3'-nitrophenyl)-2-furyl]-2-propen-1-one 4d**

Yellow crystalline solid; (FTIR (KBr) ( $\nu$ , cm<sup>-1</sup>): 1697.58 (C=O conjugated carbonyl group), 1659.96 (C=C conjugated) 1577.72 and 1361.23 (Asym and sym -NO<sub>2</sub>), Mass spectrum (EI, 70 eV, I<sub>rel</sub> %): 319 [M<sup>+</sup>] (100), 273 [M<sup>+</sup>-NO<sub>2</sub>] (6), 197 [M<sup>+</sup>-PhNO<sub>2</sub>] (31), 105 [PhCO] (20), 77 [Ph] (22), <sup>1</sup>H NMR(CDCl<sub>3</sub>, 300MHz),  $\delta$  ppm ( J, Hz) : 8.57 (1H, s, Ar-H), 7.63-7.50 (8H, m, Ar-H), 8.17 (1H, d, J =16.0, ethylenic), 6.93 (1H, d, J = 3.1, furyl proton), 6.84 (1H, d, J = 3.1, furyl proton), 8.05 (1H, d, J = 16.0, ethylenic), <sup>13</sup>C NMR (CDCl<sub>3</sub>, 75 MHz)  $\delta$  ppm: 189.64(C=O aldehyde), 153.50, 152.30 (C=C), 148.86, 138.06, 132.92, 131.42, 130.00, 129.97, 129.81, 128.70, 128.49, 122.78,120.07, 119.13, 118.37, 110.20 (Ar-C) Anal.Calcd.for C<sub>19</sub>H<sub>13</sub>NO<sub>4</sub>: C 71.47; H 4.07; N 4.38. Found C 71.43; H 4.01; N 4.20.

#### **5- 1-phenyl-3-[5-(4'-phenylcarboxylic acid)-2-furyl]-2-propen-1-one 4e**

Yellow crystalline solid; (FTIR (KBr) ( $\nu$ , cm<sup>-1</sup>): 3347.12 (-OH acid), 1683.25 (C=O acid), 1429.74 (C=C conjugated), 1642.23 (C=O

carbonyl), Mass spectrum (EI, 70 eV,  $I_{rel}$  %): 318 [ $M^+$ ] (1), 105[PhCO] (100), 77 [Ph] (99), 197 [ $M^+$ -PhCOOH] (4), 274 [ $M^+$ -COOH] (4),  $^1H$  NMR( $CDCl_3$ , 300MHz),  $\delta$  ppm (J, Hz) : 8.04 (1H, d, J = 5.7, Ar-H), 7.74-7.48 (8H, m, Ar-H), 7.47(1H, d, J = 14.6, ethylenic), 7.13 (1H, d, J = 14.6, ethylenic), 6.80 (1H, d, J = 2.9, furyl proton), 6.76 (1H, d, J = 2.9, furyl proton)  $^{13}C$  NMR ( $CDCl_3$ , 75 MHz)  $\delta$  ppm: 189.64 (C=O), 131.89, 129.42 (C=C), 168.74 (C=O of acid) 151.72, 151.09, 134.40, 134.14, 130.97, 130.68, 129.87, 129.62, 124.88, 123.59, 110.32, 107.59 (Ar-C) Anal.Calcd.for  $C_{20}H_{14}O_4$ : C 75.47; H 4.40; Found C 75.34; H 4.24.

#### 6- 1-phenyl-3-[5-(3',4'-dichlorophenyl)-2-furyl]-2-propen-1-one 4f

Yellow crystalline solid; (FTIR (KBr) ( $\nu$ ,  $cm^{-1}$ ): 1697.33 (C=O conjugated carbonyl group), 1642.54 (C=C conjugated) 1086.77 (C-Cl bond), Mass spectrum (EI, 70 eV,  $I_{rel}$  %): 344 [ $M^{+2}$ ] (33), 342 [ $M^+$ ] (100), 105 [PhCO] (79), 77 [Ph] (48), 265 [ $M^+$ -Ph] (22), 197 [ $M^+$ -PhCl<sub>2</sub>] (22), 307 [ $M^+$ -Cl] (10),  $^1H$  NMR ( $CDCl_3$ , 300MHz),  $\delta$  ppm (J, Hz) : 8.00-7.30 (8H, m, Ar-H), 7.35 (1H, d, J = 15.0, ethylenic), 7.30 (1H, d, J = 15.0, ethylenic), 6.49 (1H, d, J = 3.1, furyl proton), 6.16 (1H, d, J = 3.1, furyl proton), 7.24 1H, s, Ar-H),  $^{13}C$  NMR ( $CDCl_3$ , 75 MHz)  $\delta$  ppm : 198.02 (C=O aldehyde), 157.20, 150.24 (C=C), 136.72, 133.30, 133.05, 132.77, 130.73, 130.53, 130.47, 128.68, 128.60, 128.15, 125.05, 122.60, 108.06, 107.30 (Ar-C) Anal.Calcd.for  $C_{19}H_{12}Cl_2O_2$ : C 66.66; H 3.50; Found C 66.45; H 3.36.

#### 7- 1-phenyl-3-[5-(3',5'-dichlorophenyl)-2-furyl]-2-propen-1-one 4g

Yellow crystalline solid; (FTIR (KBr) ( $\nu$ ,  $cm^{-1}$ ): 1660.64 (C=O conjugated carbonyl group), 1599.51 (C=C conjugated), 1033.99 (C-Cl bond), Mass spectrum (EI, 70 eV,  $I_{rel}$  %): 344 [ $M^{+2}$ ] (12), 342 [ $M^+$ ] (37), 105 [PhCO] (56), 307 [ $M^+$ -Cl] (3), 77 [Ph] (100), 265 [ $M^+$ -Ph] (11),  $^1H$  NMR ( $CDCl_3$ , 300MHz),  $\delta$  ppm (J, Hz) : 8.06-7.49 (5H, m, Ar-H), 7.15 (1H, d, J = 15.7, ethylenic), 7.13 (1H, d, J = 15.7, ethylenic), 7.29 (1H, s, Ar-H), 6.55 (1H, d, J = 3.9, furyl proton), 6.28 1H, d, J = 3.9, furyl proton), 6.80 (2H, d, J = 2.8, Ar-H),  $^{13}C$  NMR ( $CDCl_3$ , 75 MHz)  $\delta$  ppm : 189.68 (C=O aldehyde), 153.25, 152.15 (C=C), 138.10, 135.67, 135.30, 133.26, 133.11, 132.90, 132.48, 130.02, 128.70, 128.16, 122.64, 121.64, 119.97, 118.39, 110.08, 108.16 (Ar-C), Anal.Calcd.for  $C_{19}H_{12}Cl_2O_2$ : C 66.66; H 3.50; Found C 66.61; H 3.28.

#### 8- 1-phenyl-3-[5-(2',5'-dichlorophenyl)-2-furyl]-2-propen-1-one 4h

Yellow crystalline solid; (FTIR (KBr) ( $\nu$ ,  $cm^{-1}$ ): 1696.25 (C=O conjugated carbonyl group), 1644.73 (C=C conjugated) 1088.23 (C-Cl bond), Mass spectrum (EI, 70 eV,  $I_{rel}$  %): 344 [ $M^{+2}$ ] (2), 342 [ $M^+$ ] (7), 307 [ $M^+$ -Cl] (5), 265 [ $M^+$ -Ph] (5), 105 [PhCO] (100), 77 [Ph] (39),  $^1H$  NMR ( $CDCl_3$ , 300MHz),  $\delta$  ppm (J, Hz) : 7.62-7.02 (9H, m, Ar-H),

7.05 (1H, d, J = 16.0, ethylenic), 6.84 (1H, d, J = 2.4, furyl proton), 6.34 (1H, d, J = 2.4, furyl proton), 7.03 (1H, d, J = 16.0, ethylenic), <sup>13</sup>C NMR (CDCl<sub>3</sub>, 75 MHz) δ ppm : 197.18 (C=O aldehyde), 153.35, 151.46 (C=C), 148.63, 138.13, 135.78, 133.20, 133.13, 132.86, 132.10, 131.69, 130.09, 129.62, 128.93, 128.69, 128.10, 127.90, 127.90, 127.57 (Ar-C) Anal.Calcd.for C<sub>19</sub>H<sub>12</sub>Cl<sub>2</sub>O<sub>2</sub>: C 66.66; H 3.50; Found C 66.57; H 3.34.

**9- 1-phenyl-3-[5-(5'-chloro-2'-nitrophenyl)-2-furyl]-2-propen-1-one**  
**4i**

Yellow crystalline solid; (FTIR (KBr) (v, cm<sup>-1</sup>): 1679.26(C=O conjugated carbonyl group), 1642.36 (C=C conjugated) 1466.10 and 1369.26 (Asym and sym -NO<sub>2</sub>), Mass spectrum (EI, 70 eV, I<sub>rel</sub> %): 355 [M<sup>+</sup>+2] (4), 353 [M<sup>+</sup>] (11), 307 [M<sup>+</sup>-NO<sub>2</sub>] (14), 197 [M<sup>+</sup>-PhClNO<sub>2</sub>](30), 105[PhCO] (47), 77 [Ph] (32), 131 [PhCOCH=CH] (5), 222 [M<sup>+</sup>-131] (11) , <sup>1</sup>H NMR (CDCl<sub>3</sub>,300MHz), δ ppm( J, Hz) : 7.28-7.24 (7H, m, Ar-H), 7.56 (1H, d, J = 14.4, ethylenic), 6.59 (1H,d, J = 3.3, furyl proton), 6.22 (1H, d, J = 3.3, furyl proton), 7.46 (1H, d, J = 14.4, ethylenic), 7.98 (1H, s, Ar-H) <sup>13</sup>C NMR (CDCl<sub>3</sub>, 75 MHz) δ ppm : 188.34(C=O aldehyde), 131.40, 128.88(C=C), 155.54, 151.78, 139.30, 134.36, 133.20, 132.41, 131.65, 131.11, 130.90, 129.92, 129.48, 120.97,119.69, 115.31, 110.82(Ar-C) Anal.Calcd.for C<sub>19</sub>H<sub>12</sub>ClNO<sub>4</sub>: C 64.58; H 3.39; N 3.96 Found C64.52; H 3.31; N 3.89.

**10- 1-phenyl-3-[5-(4'-chloro-2'-nitrophenyl)-2-furyl]-2-propen-1-one**  
**4j**

Yellow crystalline solid; (FTIR (KBr) (v, cm<sup>-1</sup>): 1697.58 (C=O conjugated carbonyl group), 1659.96 (C=C conjugated) 1577.72 and 1361.23 (Asym and sym -NO<sub>2</sub>), 1109.01 (C-Cl bond), Mass spectrum (EI, 70 eV, I<sub>rel</sub> %): 355 [M<sup>+</sup>+2] (2), 353[M<sup>+</sup>] (6), 157 [PhClNO<sub>2</sub>] (16) , 105 [PhCO] (100), 77 [Ph] (40), 222 [M<sup>+</sup>-131] (6) ,<sup>1</sup>H NMR(CDCl<sub>3</sub>, 300MHz), δ ppm( J, Hz) : 8.53-7.38 (8H, m, Ar-H), 7.34 (1H, d, J = 15.8, ethylenic),7.31 (1H, d, J = 15.8, ethylenic), 7.31 (1H, d, J = 2.1, furyl proton), 6.63 (1H, d, J = 2.1, furyl proton) <sup>13</sup>C NMR (CDCl<sub>3</sub>, 75 MHz) δ ppm : 188.78(C=O aldehyde) 131.87, 126.90 (C=C), 156.78, 151.89, 133.27, 128.65, 128.17, 110.78, 107.56 (Ar-C) Anal.Calcd.for C<sub>19</sub>H<sub>12</sub>ClNO<sub>4</sub>: C64.58; H 3.39; N 3.96 Found C 64.24; H 3.01; N 3.68.

**11- 1-phenyl-3-[5-(3''-chlorophenyl)-2-furyl]-2-propen-1-one 4k**

Yellow crystalline solid; (FTIR (KBr) (v, cm<sup>-1</sup>): 1647.00 (C=O conjugated carbonyl group), 1596.38 (C=C conjugated), 1091.05 (C-Cl bond), Mass spectrum (EI, 70 eV, I<sub>rel</sub> %): 310 [M<sup>+</sup>+2] (32), 308 [M<sup>+</sup>] (90), 273 [M<sup>+</sup>-Cl] (9), 231 [M<sup>+</sup>-Ph] (17), 105 [PhCO] (100), 178[PhClfuran] (7), 77 [Ph] (71),<sup>1</sup>H NMR (CDCl<sub>3</sub>, 300MHz), δ ppm( J, Hz) : 7.56-7.36 (9H, m, Ar-H), 7.34 (1H, d, J = 15.2, ethylenic), 6.50 (1H, d, J = 15.2, ethylenic), 6.15 (1H, d, J = 3.7, furyl proton), 7.15 (1H, d, J = 3.7, furyl proton), <sup>13</sup>C NMR (CDCl<sub>3</sub>, 75 MHz) δ ppm :

198.09(C=O aldehyde), 156.89, 151.18 (C=C), 136.85, 134.61, 133.22, 133.11, 133.03, 132.55, 129.82, 129.25, 128.66, 128.61, 128.17, 126.85, 121.53, 107.95, 106.92(Ar-C) Anal.Calcd.for C<sub>19</sub>H<sub>13</sub>ClO<sub>2</sub>: C 74.02; H 4.22; Found C 73.72; H 3.98.

#### 12- 1-phenyl-3-[5-(2'-nitrophenyl)-2-furyl]-2-propen-1-one 4l

Yellow crystalline solid; (FTIR (KBr) (v, cm<sup>-1</sup>): 1694.31 (C=O conjugated carbonyl group), 1610.33(C=C conjugated), 1586.82 and 1367.07 (Asym and sym -NO<sub>2</sub>), Mass spectrum (EI, 70 eV, I<sub>rel</sub> %): 319 [M<sup>+</sup>] (2), 272 [M<sup>+</sup>-NO<sub>2</sub>] (10), 105 [PhCO] (100). 77 [Ph] (29), <sup>1</sup>H NMR (CDCl<sub>3</sub>, 300MHz), δ ppm( J, Hz) : 7.99-7.42 (9H, m, Ar-H), 7.35 (1H, d, J = 15.4, ethylenic), 6.54 (1H, d, J = 2.1, furyl proton), 6.20 (1H, d, J = 2.1, furyl proton), 7.10 (1H, d, J = 15.4, ethylenic) <sup>13</sup>C NMR (CDCl<sub>3</sub>, 75 MHz) δ ppm : 197.99(C=O aldehyde), 158.39, 150.14(C=C), 133.21, 131.61, 128.63, 128.20, 127.77, 123.68, 110.43, 108.10 (Ar-C) Anal.Calcd.for C<sub>19</sub>H<sub>13</sub>NO<sub>4</sub>: C 71.47; H 4.07; N 4.38 Found C 71.61; H 4.28; N 4.45.

#### 13- 1-phenyl-3-[5-(2'-chloro-4'-nitrophenyl)-2-furyl]-2-propen-1-one 4m

Yellow crystalline solid; (FTIR (KBr) (v, cm<sup>-1</sup>): 1662.92 (C=O conjugated carbonyl group), 1586.65(C=C conjugated), 1467.27 (Asym and sym -NO<sub>2</sub>), 1100.81 (C-Cl bond), Mass spectrum (EI, 70 eV, I<sub>rel</sub> %): 355 [M<sup>++2</sup>] (15), 353 [M<sup>+</sup>] (41), 191 [PhClNO<sub>2</sub>furan](32), 122 [PhClNO<sub>2</sub>] (15), 105 [PhCO] (100), <sup>1</sup>H NMR (CDCl<sub>3</sub>, 300MHz), δ ppm( J, Hz) : 8.35(1H, s, Ar-H), 8.29 1H, d, J = 5.7, Ar-H), 8.20 (1H, d, J = 15.7, ethylenic), 8.04 (1H, d, J = 6.3, Ar-H), 7.99 (1H, d, J = 6.3, Ar-H), 7.79 (1H, d, J = 7.8, Ar-H), 7.71 (1H, d, J = 7.8, Ar-H), 7.60(1H, d, J = 3.3, Ar-H), 7.54 (1H, d, J = 15.7, ethylenic), 7.15 (1H, d, J = 3.3, Ar-H), 6.89 (1H, d, J = 3.1, furyl proton), 6.30 (1H, d, J = 3.1, furyl proton) <sup>13</sup>C NMR (CDCl<sub>3</sub>, 75 MHz) δ ppm : 187.89(C=O aldehyde), 130.24, 127.95 (C=C), 134.54, 131.18, 129.83, 129.62, 129.30, 128.69, 128.59, 128.19, 127.03, 124.98, 123.04, 116.69, 109.73 (Ar-C) Anal.Calcd.for C<sub>19</sub>H<sub>12</sub> ClNO<sub>4</sub>: C 64.58; H 3.39; N 3.96 Found C 64.35; H 3.45; N 3.58.

#### 14- 1-phenyl-3-[5-(3'-phenylcarboxylic acid)-2-furyl]-2-propen-1-one 4n

Yellow crystalline solid; (KBr) (v, cm<sup>-1</sup>): 1644.73 (C=O), 1464.64 (C=C conjugated), 3109.35 (-OH acid), 1696.25 (C=O of acid), Mass spectrum (EI, 70 eV, I<sub>rel</sub> %): 318 [M<sup>+</sup>] (75), 273 [M<sup>+</sup>-COOH] (22), 197 [M<sup>+</sup>-PhCOOH] (15), 105 [PhCO] (100), <sup>1</sup>H NMR(CDCl<sub>3</sub>, 300MHz), δ ppm( J, Hz) : 10.12 (1H, s, COOH), 8.35-8.12 (3H, m, Ar-H), 8.09 (1H, s, Ar-H), 7.48-7.29 (4H, m, Ar-H), 7.93 (1H, d, J = 16.2, ethylenic), 7.23 (1H, d, J = 2.9, furylproton), 7.67 (1H, d, J = 16.2, ethylenic), 6.92 (1H, d, J = 2.9, furyl proton), <sup>13</sup>C NMR (CDCl<sub>3</sub>, 75 MHz) δ ppm : 189.54(C=O aldehyde), 165.44 (C=O acid) 131.86,

127.11 (C=C), 155.43, 151.69, 137.75, 133.89, 130.23, 129.88, 122.45, 121.78, 119.34, 110.37 (Ar-C) Anal. Calcd. for  $C_{20}H_{14}O^4$ : C 75.47; H 4.40; Found C 75.67; H 4.58.

**15- 1-phenyl-3-[5-(2',4'-dichlorophenyl)-2-furyl]-2-propen-1-one 4o**

Yellow crystalline solid; (FTIR (KBr) ( $\nu$ ,  $cm^{-1}$ ): 1697.97 (C=O), 1642.20 (C=C conjugated), 1086.66 (C-Cl bond), Mass spectrum (EI, 70 eV,  $I_{rel}$  %): 344 [ $M^{+}+2$ ] (10), 342 [ $M^{+}$ ] (28), 307 [ $M^{+}-Cl$ ] (10), 197 [ $M^{+}-PhCl_2$ ] (32), 139 [ $PhCOCl$ ] (15), 105 [ $PhCO$ ] (74)  $^1H$  NMR ( $CDCl_3$ , 300MHz),  $\delta$  ppm (J, Hz) : 7.50-7.91 (8H, m, Ar-H), 7.47 (1H, d, J = 15.3, ethylenic), 6.79 (1H, d, J = 15.3, ethylenic), 6.80 (2H, d, J = 3.3, furyl proton)  $^{13}C$  NMR ( $CDCl_3$ , 75 MHz)  $\delta$  ppm : 188.56 (C=O aldehyde), 130.32, 129.77 (C=C), 153.60, 151.08, 137.43, 133.39, 133.21, 128.71, 127.92, 127.70, 126.47, 119.90, 110.02 (Ar-C) Anal. Calcd. for  $C_{19}H_{12}Cl_2O_2$ : C 66.66; H 3.50; Found C 66.10; H 3.63.

**16- 1-phenyl-3-[5-(2'-methyl-5'-nitrophenyl)-2-furyl]-2-propen-1-one 4p**

Yellow crystalline solid; (FTIR (KBr) ( $\nu$ ,  $cm^{-1}$ ): 1668.87 (C=O conjugated carbonyl group), 1586.65 (C=C conjugated) 1530.78 and 1351.23 (Asym and sym  $-NO_2$ ), Mass spectrum (EI, 70 eV,  $I_{rel}$  %): 331 [ $M^{+}$ ] (34), 318 [ $M^{+}-CH_3$ ] (45), 287 [ $M^{+}-NO_2$ ] (10), 197 [ $M^{+}-136$ ] (18), 105 [ $PhCO$ ] (100),  $^1H$  NMR ( $CDCl_3$ , 300MHz),  $\delta$  ppm (J, Hz) : 8.15-8.03 (4H, m, Ar-H), 8.11 (1H, d, J = 8.7, Ar-H), 7.72 (1H, d, J = 8.7, Ar-H), 7.69 (4H, m, Ar-H), 7.60 (1H, d, J = 15.9, ethylenic), 7.33 (1H, d, J = 3.6, furyl proton), 7.23 (1H, d, J = 3.6, furyl proton), 7.47 (1H, d, J = 15.9, ethylenic), 2.12 (3H, s,  $CH_3$ )  $^{13}C$  NMR ( $CDCl_3$ , 75 MHz)  $\delta$  ppm : 188.71 (C=O), 130.00, 128.32 (C=C), 21.84 ( $CH_3$ ), 152.76, 151.43, 146.28, 142.64, 137.49, 133.10, 132.99, 129.73, 128.67, 122.60, 121.40, 119.80, 118.94, 114.08 (Ar-C), 15.43 ( $CH_3$ ) Anal. Calcd. for  $C_{20}H_{15}NO_4$ : C 72.07; H 4.50; N 4.20 Found C 71.78; H 3.91; N 4.01.

**17- 1-phenyl-3-[5-(2', 4'-dinitrophenyl)-2-furyl]-2-propen-1-one 4q**

Yellow crystalline solid; (FTIR (KBr) ( $\nu$ ,  $cm^{-1}$ ): 1659.34  $cm^{-1}$  (C=O conjugated carbonyl group), 1591.21  $cm^{-1}$  (C=C conjugated), 1552.82 and 1357.17  $cm^{-1}$  (Asym and sym  $-NO_2$ ), Mass spectrum (EI, 70 eV,  $I_{rel}$  %): 364 [ $M^{+}$ ] (100), 318 [ $M^{+}-NO_2$ ] (55), 197 [ $M^{+}-167$ ] (18), 167 [ $M^{+}-Ph(NO_2)_2$ ] (10), 105 [ $PhCO$ ] (45),  $^1H$  NMR ( $CDCl_3$ , 300MHz),  $\delta$  ppm (J, Hz) : 9.10 (1H, s, Ar-H), 6.80 (1H, d, J = 3.1, furyl proton), 7.00 (1H, d, J = 3.1, furyl proton), 7.51-7.70 (5H, m, Ar-H), 8.10 (2H, d, J = 4.3, Ar-H), 8.30 (1H, s, Ar-H), 8.42 (1H, s, Ar-H), 7.34 (1H, d, J = 15.4, ethylenic), 6.90 (1H, d, J = 15.4, ethylenic),  $^{13}C$  NMR ( $CDCl_3$ , 75 MHz)  $\delta$  ppm : 188.58 (C=O), 152.45, 149.62 (C=C) 146.46, 137.31,

133.31, 132.84, 129.63, 129.53, 129.04, 128.87, 128.46, 126.04, 122.56, 121.19, 119.12, 117.18 (Ar-C) Anal.Calcd.for C<sub>19</sub>H<sub>12</sub>N<sub>2</sub>O<sub>6</sub>: C 62.63; H 3.29; N 7.69 Found C 62.42; H 3.10; N 6.99.

**18- 1-phenyl-3-[5-(2'-methyl-3'-nitrophenyl)-2-furyl]-2-propen-1-one 4r**

Yellow crystalline solid; (FTIR (KBr) (v, cm<sup>-1</sup>): 1697.58 (C=O), 1659.95(C=C conjugated) 1577.72 and 1361.23 (Asym and sym -NO<sub>2</sub>), Mass spectrum (EI, 70 eV, I<sub>rel</sub>%): 333 [M<sup>+</sup>] (20), 286 [M<sup>+</sup>-NO<sub>2</sub>] (5), 77 [Ph] (100), 215 [M<sup>+</sup>-PhCOCH] (10), 197 [M<sup>+</sup>-PhCH<sub>3</sub>NO<sub>2</sub>] (10), 157 [286- PhCOCHCH] (75), 105 [PhCO] (58), <sup>1</sup>H NMR (CDCl<sub>3</sub>, 300MHz), δ ppm( J, Hz) : 8.15-7.68 (9H, m, Ar-H), 7.67 (1H, d, J = 16.7, ethylenic), 7.57 (1H, d, J = 16.7, ethylenic), 7.28 (1H, d, J = 2.9, furyl proton), 7.11 (1H, d, J = 2.9, furyl proton), 2.52 (3H, s, CH<sub>3</sub>), <sup>13</sup>C NMR (CDCl<sub>3</sub>, 75 MHz) δ ppm : 188.56 (C=O), 131.42, 127.95 (C=C), 16.53 (CH<sub>3</sub>), 153.06, 151.99, 151.38, 137.44, 133.14, 131.65, 129.98, 128.84, 128.68, 127.34, 119.50, 114.36 (Ar-C), Anal.Calcd.for C<sub>20</sub>H<sub>15</sub>NO<sub>4</sub>: C 72.07; H 4.50; N 4.20 Found C 72.01; H 3.92; N 4.02

**19- 1-phenyl-3-[5-(2'-chlorophenyl)-2-furyl]-2-propen-1-one 4s**

Yellow crystalline solid; (FTIR (KBr) (v, cm<sup>-1</sup>): 1694.31 (C=O), 1586.82 (C=C conjugated), 1030.49 (C-Cl bond), Mass spectrum (EI, 70 eV, I<sub>rel</sub> %): 310 [M<sup>+</sup>+2] (11), 308 [M<sup>+</sup>] (38), 273[M<sup>+</sup>-Cl] (76), 139 [PhCOCl] (100), 197 [M<sup>+</sup>-PhCl] (12), 111 [PhCl] (46), 105 [PhCO] (58) <sup>1</sup>H NMR (CDCl<sub>3</sub>, 300MHz), δ ppm( J, Hz) : 7.67-7.27 (9H, m, Ar-H), 7.76 (1H, d, J = 16.7, ethylenic), 7.71 (1H, d, J = 16.7, ethylenic), 7.25 (1H, d, J = 2.9, furyl proton), 7.20 (1H, d, J = 2.9, furyl proton) <sup>13</sup>C NMR (CDCl<sub>3</sub>, 75 MHz) δ ppm : 187.65 (C=O), 131.44, 127.34 (C=C), 155.29, 151.36, 137.55, 133.25, 132.19, 130.78, 129.46, 126.45, 122.74, 118.90, 110.68 (Ar-C), Anal.Calcd.for C<sub>19</sub>H<sub>13</sub>ClO<sub>2</sub>: C 74.02; H 4.22; Found C 73.85; H 3.99.
